# Supplementary material for: Risk of Paradoxical Eczema in Patients Receiving Biologics for Psoriasis
Source: PubMed Central journal article supplement (PMC10701661; doi:10.1001/jamadermatol.2023.4846), 2023-12-06
Supplement: jamadermatol-e234846-s001.pdf [file jamadermatol-e234846-s001.pdf]

## Supplementary Online Content

Al-Janabi A, Alabas OA, Yiu ZZN, et al. Risk of paradoxical eczema in patients with psoriasis treated with biologics. *JAMA Dermatol*. Published online December 6, 2023. doi:10.1001/jamadermatol.2023.4846

### eMethods.

**eFigure 1.** Days from Biologic Initiation to Onset of Paradoxical Eczema.

**eFigure 2.** Distribution of Age of Onset in Paradoxical Eczema Cases

**eFigure 3.** Days to Biologic Discontinuation Following Onset of Paradoxical Eczema or Other Eczema Phenotypes

**eFigure 4.** Histogram Showing Days From Cessation of Methotrexate or Ciclosporin, Taken Concurrently With a Biologic at Biologic Initiation, to Onset of Paradoxical Eczema

**eTable 1.** Confounder Bias Before and After Inverse Probability Treatment Weighting by Propensity Score

**eTable 2.** Missing Data From Observations Included in Primary Analysis (n=24,997)

**eTable 3.** Missing Data From Observations Included in First-Line Biologic Sensitivity Analysis (n=11,732)

**eTable 4.** Features of Paradoxical Eczema Events (n=265)

**eTable 5.** Characteristics of Participants With One Versus More Than One Paradoxical Eczema Event (Index Event Only)

**eTable 6.** Propensity Weight-Adjusted Cox Proportional Hazards Model of Paradoxical Eczema by Biologic Drug, Using Guselkumab as the Reference Category

**eTable 7.** Propensity Weight-Adjusted Cox Proportional Hazards Model of Paradoxical Eczema by Biologic Class or Biologic Drug, Without an Exposure Risk Window (Sensitivity Analysis)

**eTable 8.** Propensity Weight-Adjusted Cox Proportional Hazards Model of Paradoxical Eczema by Biologic Class or Biologic Drug, Limited to First-Line Therapy Only (Sensitivity Analysis)

**eTable 9.** Number of Exposures Linked to Eczema or Dermatitis Adverse Events Other Than Paradoxical Eczema

**eTable 10.** Propensity Weight-Adjusted Cox Proportional Hazards Model for Risk of Other Eczema Phenotypes by Biologic Class, Biologic Drug or Other Covariates (Sensitivity Analysis)

**eTable 11.** Propensity Weight-Adjusted Cox Proportional Hazards Model for Risk of Paradoxical Eczema by Biologic Class or Other Covariates, Adjusting Time-Varying Use of Non-Biologic Systemic Therapies (Sensitivity Analysis)

## References

This supplementary material has been provided by the authors to give readers additional information about their work.

## eMethods

### Descriptive statistics

Additional descriptive statistics for participants who developed multiple paradoxical eczema events were compared numerically with participants who had a single event. For multiple-event statistics, only the first exposure was considered for events associated with more than one exposure due to overlapping risk windows.

### Confounder selection

Covariate selection was based on expert opinion and a systematic review of reported cases of paradoxical eczema.<sup>1</sup> These included: age, sex, ethnicity, alcohol consumption, smoking status and history of previous AD, asthma, hay fever, psoriatic arthritis (PsA) or other psoriasis phenotypes (erythrodermic, generalised pustular or palmoplantar pustulosis) at baseline. Age remained a continuous variable during analysis and was adjusted to represent age at the start of each exposure. Comorbidity covariates (atopic diseases, PsA and other psoriasis phenotypes) were recorded prior to initiation of the first-line biologic therapy. Because alcohol consumption and smoking status are time-varying covariates for which data was not available beyond the first-line exposure, we included these in a separate analysis limited to first-line exposures only.

### Sensitivity analyses

We undertook several sensitivity analyses to test various assumptions. Firstly, because an adverse event risk period of 90 days is arbitrary and may vary between individual drugs depending on half-life, we repeated the primary analysis using a risk window of 0 days instead of 90 days. Secondly, as described above, we undertook an analysis including only first-line biologic exposures in case our findings could have been influenced by time-varying covariates. Thirdly, to identify whether our findings are specific to the paradoxical eczema phenotype or eczematous reactions in general, we repeated our analysis for those with alternative eczema/dermatitis adverse events, such as contact dermatitis, seborrheic dermatitis and stasis dermatitis. Lastly, we repeated the analysis after adjusting for concomitant non-biologic systemic therapies, because such treatments could confound outcome by either suppressing (or contributing to) the development of an eczema phenotype or be prescribed for it. We included concomitant treatment as a binary variable, indicating whether any of the following were given at the time of biologic initiation: acitretin; apremilast; ciclosporin; dimethyl fumarate; hydroxycarbamide; methotrexate; mycophenolate mofetil. We then repeated this using a categorical variable stratified by drug.

### Post hoc analyses

Some of the descriptive statistics relating to paradoxical eczema events, such as treatments used, were derived from free text adverse event descriptions which may not necessarily capture full details of treatment discontinuation related to paradoxical eczema. To further understand the impact of paradoxical eczema on biologic discontinuation, we compared the distributions of days from eczema onset to the end of biologic exposure with the other eczematous phenotypes (Mann-Whitney U test).

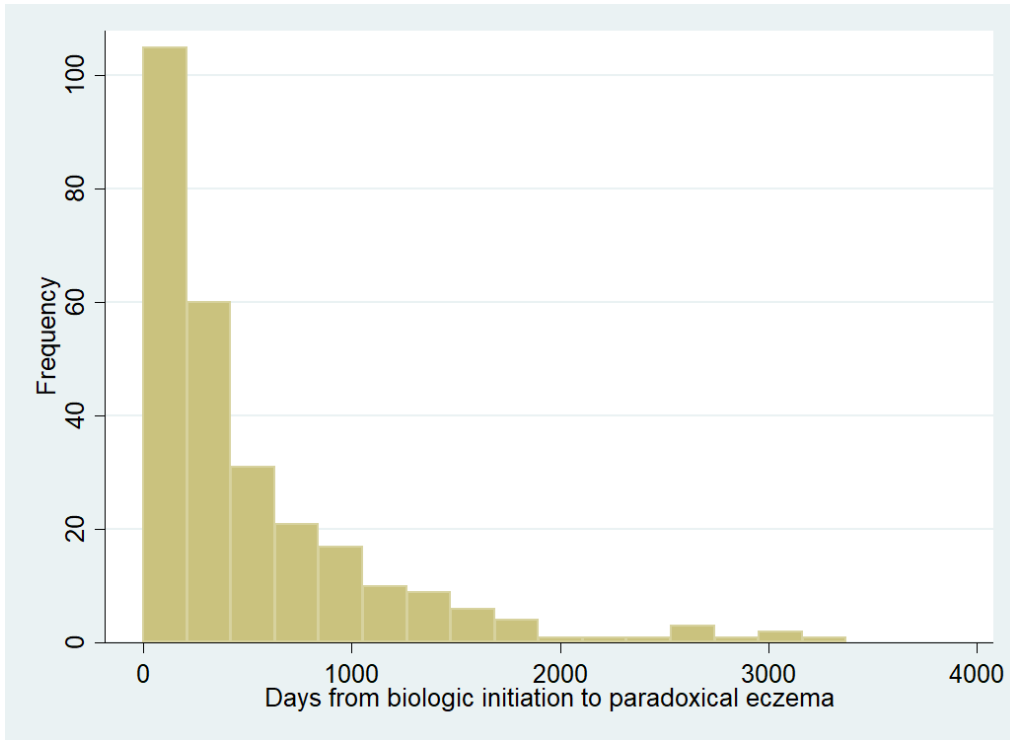

**eFigure 1. Days from biologic initiation to onset of paradoxical eczema.**

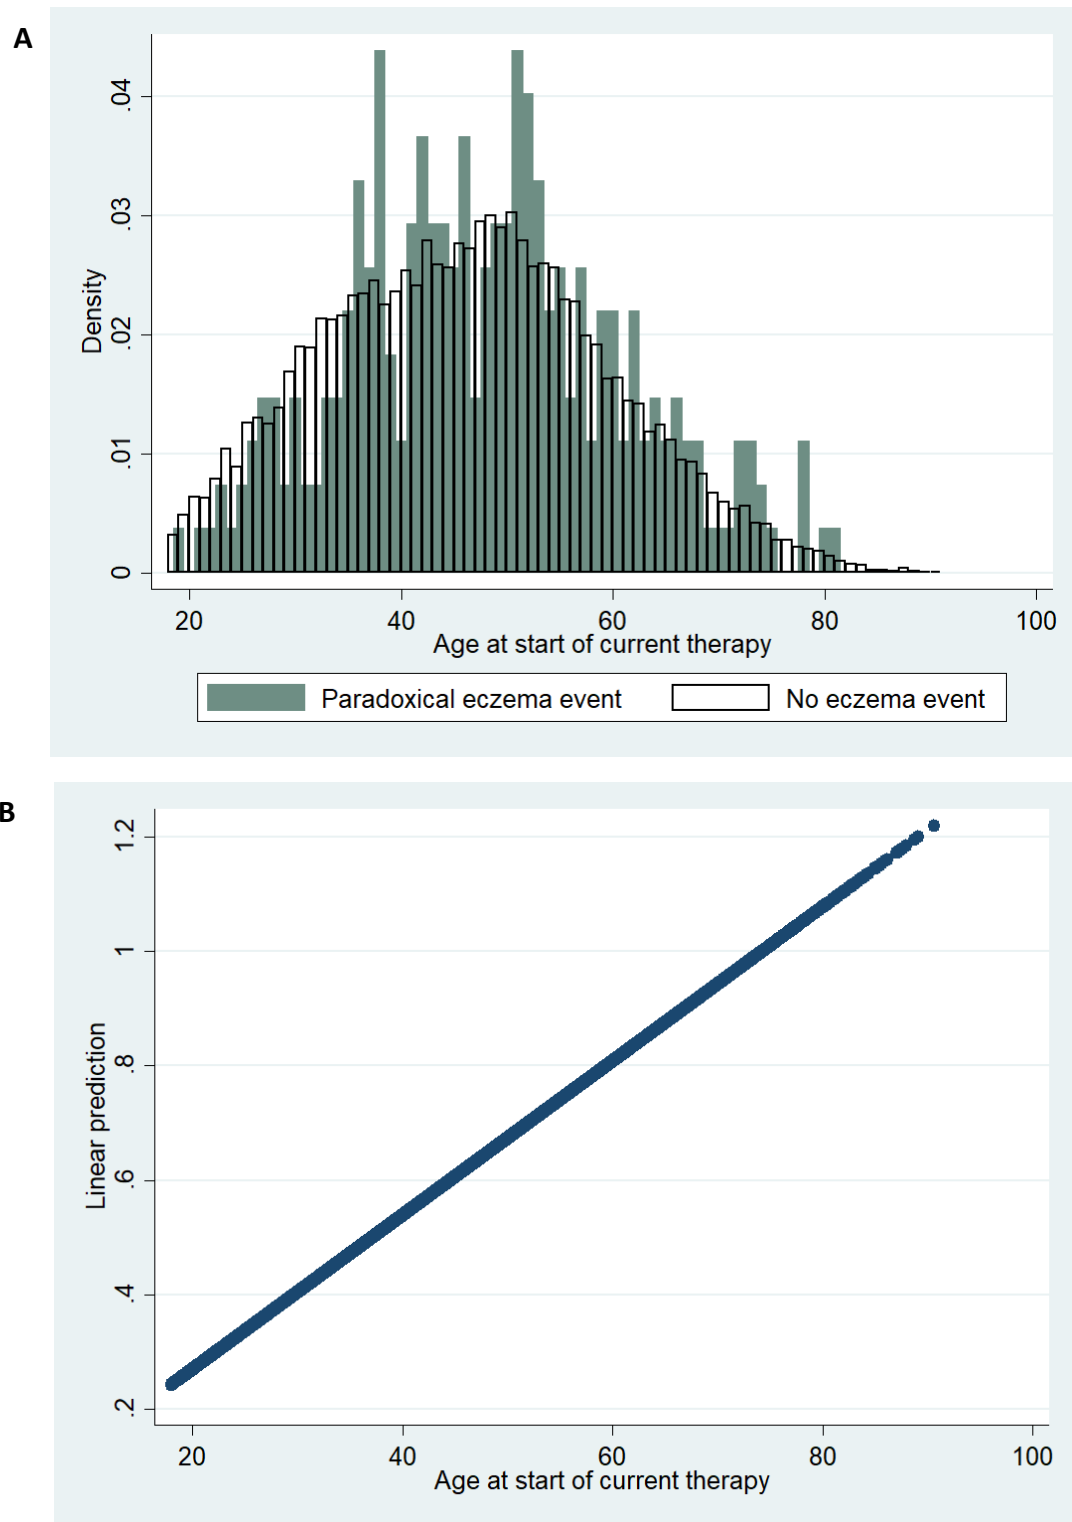

**eFigure 2. Distribution of age of onset in paradoxical eczema cases.**

A) Histogram of number of exposures by age at start of exposure, split by whether the exposure resulted in paradoxical eczema or not. B) Plot demonstrating linear increase between age and the survival analysis linear predictor.

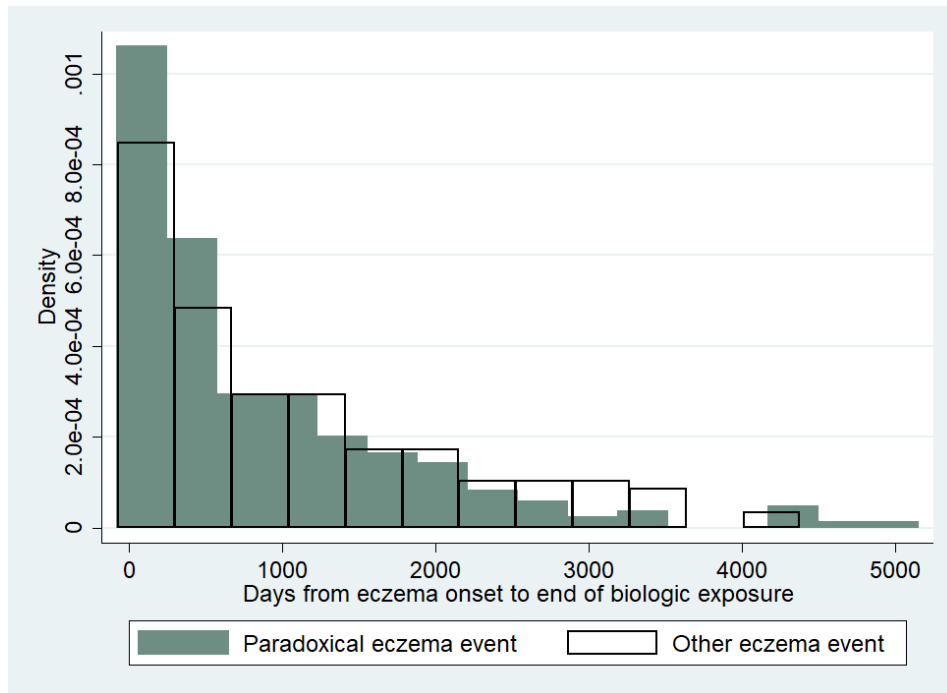

**eFigure 3. Days to biologic discontinuation following onset of paradoxical eczema or other eczema phenotypes.**

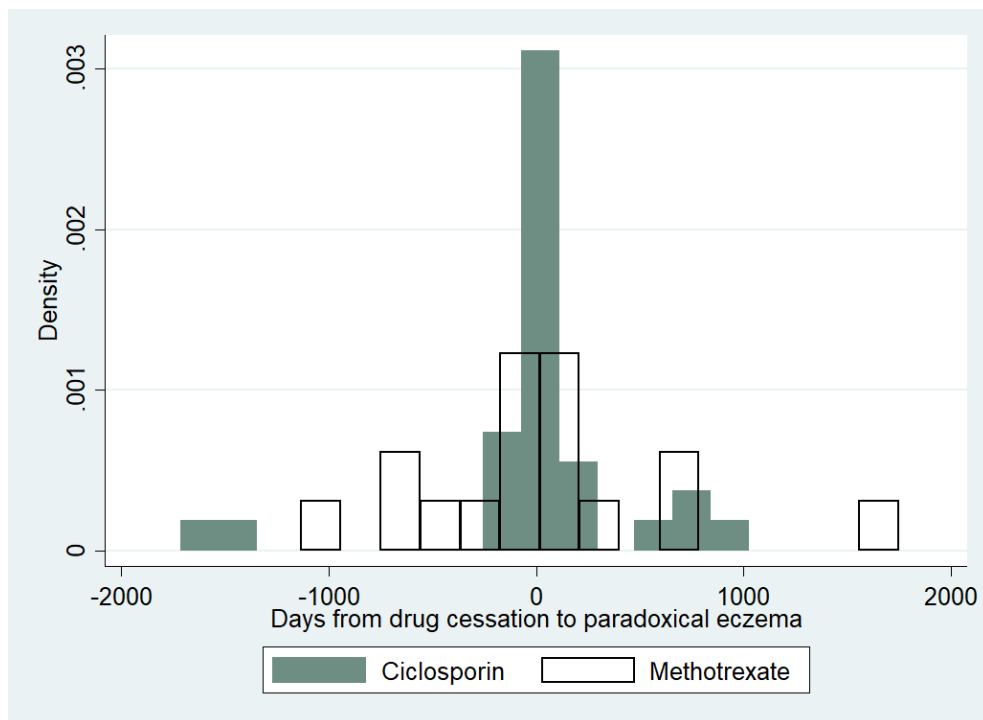

**eFigure 4. Histogram showing days from cessation of methotrexate or ciclosporin, taken concurrently with a biologic at biologic initiation, to onset of paradoxical eczema.**

**eTable 1. Confounder bias before and after inverse probability treatment weighting by propensity score.**

|                                | IL-17i               |                     | IL-12/23i            |                     | IL-23i               |                     |
|--------------------------------|----------------------|---------------------|----------------------|---------------------|----------------------|---------------------|
|                                | Before weighting (%) | After weighting (%) | Before weighting (%) | After weighting (%) | Before weighting (%) | After weighting (%) |
| Age                            | 0.154                | 0.005               | 0.064                | 0.002               | 0.233                | -0.008              |
| Male sex                       | 0.007                | 0.006               | 0.014                | 0.006               | -0.003               | 0.000               |
| Ethnicity                      |                      |                     |                      |                     |                      |                     |
| Black                          | 0.032                | 0.002               | 0.018                | -0.002              | 0.041                | 0.004               |
| Chinese                        | 0.016                | 0.000               | 0.003                | 0.001               | -0.001               | 0.000               |
| Other <sup>a</sup>             | 0.024                | 0.001               | 0.012                | 0.001               | 0.007                | -0.002              |
| South Asian                    | 0.082                | 0.002               | 0.048                | -0.003              | 0.108                | -0.004              |
| White                          | -0.091               | -0.002              | -0.050               | 0.002               | -0.103               | 0.003               |
| Psoriatic arthritis            | 0.080                | 0.001               | -0.173               | -0.001              | -0.177               | -0.001              |
| Atopic dermatitis              | 0.030                | 0.000               | 0.015                | -0.002              | 0.060                | 0.003               |
| Asthma                         | 0.009                | -0.002              | 0.009                | 0.002               | 0.082                | -0.007              |
| Hay fever                      | -0.005               | -0.001              | -0.024               | -0.002              | 0.037                | -0.001              |
| Erythrodermic psoriasis        | -0.009               | 0.001               | 0.011                | 0.003               | -0.026               | -0.001              |
| Generalised pustular psoriasis | 0.022                | 0.003               | -0.001               | -0.002              | -0.024               | -0.010              |
| Palmoplantar pustulosis        | -0.003               | 0.002               | -0.027               | 0.003               | -0.004               | -0.001              |

Data displayed as standardised mean differences for biologic classes relative to tumour necrosis factor inhibitors.

IL, interleukin; IL-17i, IL-17 inhibitor; IL-12/23i, IL-12/23 inhibitor; IL-23i, IL-23 inhibitor.

<sup>a</sup> "Other" ethnicities were either defined as other by the study participant, or were missing (n=20).

**eTable 2. Missing data from observations included in primary analysis (n=24,997).**

| Variable                       | Missing data, n(%) |
|--------------------------------|--------------------|
| Biologic exposure              | 0 (0)              |
| Age                            | 0 (0)              |
| Sex                            | 0 (0)              |
| Ethnicity                      | 20 (0.08)          |
| Psoriatic arthritis            | 0 (0)              |
| Atopic dermatitis              | 0 (0)              |
| Asthma                         | 0 (0)              |
| Hay fever                      | 0 (0)              |
| Erythrodermic psoriasis        | 16 (0.06)          |
| Generalised pustular psoriasis | 37 (0.15)          |
| Palmoplantar pustulosis        | 54 (0.22)          |

**eTable 3. Missing data from observations included in first-line biologic sensitivity analysis (n=11,732).**

| Variable                       | Missing data, n(%) |
|--------------------------------|--------------------|
| Biologic exposure              | 0 (0)              |
| Age                            | 0 (0)              |
| Sex                            | 0 (0)              |
| Ethnicity                      | 4 (0.03)           |
| Psoriatic arthritis            | 0 (0)              |
| Atopic dermatitis              | 0 (0)              |
| Asthma                         | 0 (0)              |
| Hay fever                      | 0 (0)              |
| Erythrodermic psoriasis        | 8 (0.07)           |
| Generalised pustular psoriasis | 18 (0.15)          |
| Palmoplantar pustulosis        | 23 (0.20)          |
| Smoking                        | 930 (7.93)         |
| Alcohol                        | 996 (8.49)         |

**eTable 4. Features of paradoxical eczema events (n=265).**

| Clinical feature                         | N   | %   |
|------------------------------------------|-----|-----|
| <b>Site</b>                              |     |     |
| Not specified                            | 61  | 23  |
| Generalised                              | 16  | 6   |
| Scalp                                    | 4   | 1.5 |
| Face or neck                             | 68  | 26  |
| Trunk                                    | 35  | 13  |
| Flexures                                 | 27  | 10  |
| Limbs not otherwise specified            | 61  | 23  |
| Hands or feet                            | 33  | 13  |
| Ears                                     | 5   | 2   |
| Genitals                                 | 7   | 3   |
| <b>Signs and symptoms</b>                |     |     |
| Pruritus                                 | 49  | 19  |
| Pain                                     | 9   | 3   |
| Redness                                  | 18  | 7   |
| Swelling                                 | 8   | 3   |
| Dry                                      | 11  | 4   |
| Vesicles or blisters                     | 6   | 2   |
| Lichenification                          | 5   | 2   |
| Fissure                                  | 5   | 2   |
| <b>Investigations</b>                    |     |     |
| Biopsy shows eczema/spongiosis           | 20  | NA  |
| Biopsy shows eczema & psoriasis features | 1   | NA  |
| Eosinophilia                             | 1   | NA  |
| Elevated IgE                             | 1   | NA  |
| <b>Treatments</b>                        |     |     |
| Not specified                            | 108 | 41  |
| Topical                                  | 115 | 44  |
| Pause biologic                           | 3   | 1   |
| Stop biologic                            | 5   | 2   |
| Switch biologic                          | 12  | 5   |
| Phototherapy                             | 5   | 2   |
| Prednisolone                             | 12  | 5   |
| Methotrexate                             | 3   | 1   |



|                      |    |   |
|----------------------|----|---|
| Ciclosporin          | 2  | 1 |
| Oral antibiotics     | 20 | 8 |
| Antihistamines       | 8  | 3 |
| Oral retinoid        | 2  | 1 |
| Admitted to hospital | 4  | 2 |

IgE, immunoglobulin E; NA, not applicable.

**eTable 5. Characteristics of participants with one versus more than one paradoxical eczema event (index event only).**

|                                                                                     | Single event group (n=221) | Multiple event group (n=20) |
|-------------------------------------------------------------------------------------|----------------------------|-----------------------------|
| <b>Age, median (IQR)</b>                                                            | 49 (39-57)                 | 46 (36-53)                  |
| <b>Sex, n(%)</b>                                                                    |                            |                             |
| Female                                                                              | 118 (53)                   | 11 (55)                     |
| Male                                                                                | 103 (47)                   | 9 (45)                      |
| <b>Ethnicity, n(%)</b>                                                              |                            |                             |
| Black                                                                               | 2 (1)                      | 0 (0)                       |
| Chinese                                                                             | 3 (1)                      | 1 (5)                       |
| Other <sup>a</sup>                                                                  | 6 (3)                      | 0 (0)                       |
| South Asian                                                                         | 11 (5)                     | 3 (15)                      |
| White                                                                               | 199 (90)                   | 16 (80)                     |
| <b>Atopy at baseline, n(%)</b>                                                      |                            |                             |
| AD                                                                                  | 17 (8)                     | 2 (10)                      |
| Asthma                                                                              | 30 (14)                    | 2 (10)                      |
| Hay fever                                                                           | 3 (1)                      | 4 (20)                      |
| <b>PsA at baseline, n(%)</b>                                                        | 67 (30)                    | 8 (40)                      |
| <b>Other psoriasis phenotypes, n(%)</b>                                             |                            |                             |
| Erythrodermic                                                                       | 39 (18)                    | 4 (20)                      |
| Generalised pustular                                                                | 10 (5)                     | 1 (5)                       |
| Palmoplantar pustulosis                                                             | 7 (3)                      | 0 (0)                       |
| <b>Biologic class, n(%)<sup>b</sup></b>                                             |                            |                             |
| TNFi                                                                                | 111 (50)                   | 16 (80)                     |
| IL-17i                                                                              | 41 (19)                    | 2 (10)                      |
| IL-12/23i                                                                           | 63 (28)                    | 2 (10)                      |
| IL-23i                                                                              | 6 (3)                      | 0 (0)                       |
| <b>Combined with non-biologic systemic at biologic initiation, n(%)<sup>b</sup></b> |                            |                             |
| Methotrexate                                                                        | 14 (6)                     | 2 (10)                      |
| Acitretin                                                                           | 1 (0)                      | 0 (0)                       |
| Hydroxycarbamide                                                                    | 0 (0)                      | 0 (0)                       |
| Apremilast                                                                          | 1 (0)                      | 0 (0)                       |
| Mycophenolate mofetil                                                               | 0 (0)                      | 0 (0)                       |
| Ciclosporin                                                                         | 18 (8)                     | 5 (25)                      |
| Dimethyl fumarate                                                                   | 2 (1)                      | 1 (5)                       |
| <b>Combined with non-biologic systemic at any point, n(%)<sup>b</sup></b>           |                            |                             |
| Methotrexate                                                                        | 27 (12)                    | 3 (15)                      |
| Acitretin                                                                           | 5 (2)                      | 0 (0)                       |
| Hydroxycarbamide                                                                    | 1 (0)                      | 0 (0)                       |
| Apremilast                                                                          | 3 (1)                      | 0 (0)                       |
| Mycophenolate mofetil                                                               | 0 (0)                      | 0 (0)                       |
| Ciclosporin                                                                         | 27 (12)                    | 7 (35)                      |
| Dimethyl fumarate                                                                   | 4 (2)                      | 1 (5)                       |

<sup>a</sup> "Other" ethnicities were either defined as other by the study participant, or were missing (n=20).

<sup>b</sup> Drug-related statistics for both groups reflect those at the time of initiation of the biologic associated with the index paradoxical eczema event.

**eTable 6. Propensity weight-adjusted Cox proportional hazards model of paradoxical eczema by biologic drug, using guselkumab as the reference category.**

| <b>Biologic</b>            | <b>Hazard ratio</b> | <b>95% CI</b> | <b>P-value</b> |
|----------------------------|---------------------|---------------|----------------|
| Guselkumab (reference)     |                     |               |                |
| Adalimumab                 | 3.62                | 1.40-9.32     | 0.008          |
| Certolizumab pegol         | 4.90                | 1.12-21.42    | 0.04           |
| Etanercept                 | 3.47                | 1.22-9.87     | 0.02           |
| Infliximab                 | 3.44                | 1.00-11.81    | 0.05           |
| Brodalumab                 | 4.89                | 1.35-17.68    | 0.02           |
| Ixekizumab                 | 4.04                | 1.35-12.07    | 0.01           |
| Secukinumab                | 3.53                | 1.33-9.35     | 0.01           |
| Bimekizumab <sup>a</sup>   | NA                  | NA            | NA             |
| Ustekinumab                | 3.14                | 1.20-8.22     | 0.02           |
| Risankizumab               | 2.83                | 0.69-11.59    | 0.15           |
| Tildrakizumab <sup>a</sup> | NA                  | NA            | NA             |

CI, confidence interval.

<sup>a</sup>The data for bimekizumab and tildrakizumab are not shown due to unstable effect estimates, resulting from the low number of exposures and absence of paradoxical eczema events attributed to these drugs.

**eTable 7. Propensity weight-adjusted Cox proportional hazards model of paradoxical eczema by biologic class or biologic drug, without an exposure risk window (sensitivity analysis).**

|                                                                       | <b>Hazard ratio</b> | <b>95% CI</b> | <b>P-value</b> |
|-----------------------------------------------------------------------|---------------------|---------------|----------------|
| <i>Model 1 - biologic class (TNFi reference category)</i>             |                     |               |                |
| IL-17i                                                                | 1.05                | 0.75-1.47     | 0.77           |
| IL-12/23i                                                             | 0.92                | 0.69-1.24     | 0.59           |
| IL-23i                                                                | 0.41                | 0.19-0.88     | 0.02           |
| <i>Model 2 - individual biologics (adalimumab reference category)</i> |                     |               |                |
| Certolizumab pegol                                                    | 1.54                | 0.48-4.90     | 0.47           |
| Etanercept                                                            | 0.85                | 0.50-1.46     | 0.56           |
| Infliximab                                                            | 0.71                | 0.26-1.93     | 0.50           |
| Brodalumab                                                            | 1.48                | 0.60-3.68     | 0.39           |
| Ixekizumab                                                            | 1.13                | 0.60-2.13     | 0.70           |
| Secukinumab                                                           | 0.95                | 0.65-1.40     | 0.79           |
| Bimekizumab <sup>a</sup>                                              | NA                  | NA            | NA             |
| Ustekinumab                                                           | 0.90                | 0.66-1.21     | 0.48           |
| Guselkumab                                                            | 0.24                | 0.084-0.71    | 0.010          |
| Risankizumab                                                          | 0.89                | 0.31-2.59     | 0.83           |
| Tildrakizumab <sup>a</sup>                                            | NA                  | NA            | NA             |

CI, confidence interval; IL, interleukin; IL-17i, IL-17 inhibitor; IL-12/23i, IL-12/23 inhibitor; IL-23i, IL-23 inhibitor; TNFi, tumour necrosis factor inhibitor.

<sup>a</sup>The data for bimekizumab and tildrakizumab are not shown due to unstable effect estimates, resulting from the low number of exposures and absence of paradoxical eczema events attributed to these drugs.

**eTable 8. Propensity weight-adjusted Cox proportional hazards model of paradoxical eczema by biologic class or biologic drug, limited to first-line therapy only (sensitivity analysis).**

|                                                                       | Hazard ratio | 95% CI     | P-value |
|-----------------------------------------------------------------------|--------------|------------|---------|
| <i>Model 1 - biologic class (TNFi reference category)</i>             |              |            |         |
| IL-17i                                                                | 1.07         | 0.67-1.71  | 0.77    |
| IL-12/23i                                                             | 0.84         | 0.57-1.25  | 0.39    |
| IL-23i                                                                | 0.17         | 0.023-1.19 | 0.07    |
| <i>Model 2 - individual biologics (adalimumab reference category)</i> |              |            |         |
| Certolizumab pegol                                                    | 5.41         | 1.66-17.57 | 0.005   |
| Etanercept                                                            | 0.45         | 0.22-0.95  | 0.04    |
| Infliximab                                                            | 0.85         | 0.21-3.46  | 0.82    |
| Brodalumab                                                            | 1.61         | 0.40-6.55  | 0.50    |
| Ixekizumab                                                            | 1.17         | 0.42-3.23  | 0.76    |
| Secukinumab                                                           | 0.91         | 0.53-1.55  | 0.72    |
| Bimekizumab <sup>a</sup>                                              | NA           | NA         | NA      |
| Ustekinumab                                                           | 0.77         | 0.51-1.15  | 0.20    |
| Guselkumab                                                            | 0.21         | 0.030-1.55 | 0.12    |
| Risankizumab <sup>a</sup>                                             | NA           | NA         | NA      |
| Tildrakizumab <sup>a</sup>                                            | NA           | NA         | NA      |
| <i>Model 3 - smoking and alcohol<sup>b</sup></i>                      |              |            |         |
| Smoking                                                               |              |            |         |
| Previous smoker                                                       | 0.89         | 0.60-1.32  | 0.56    |
| Current smoker                                                        | 0.79         | 0.50-1.25  | 0.31    |
| Currently drinks alcohol                                              | 1.10         | 0.75-1.60  | 0.64    |

CI, confidence interval; IL, interleukin; IL-17i, IL-17 inhibitor; IL-12/23i, IL-12/23 inhibitor; IL-23i, IL-23 inhibitor; NA, not applicable; TNFi, tumour necrosis factor inhibitor.

<sup>a</sup> The data for bimekizumab, risankizumab and tildrakizumab are not shown due to unstable effect estimates, resulting from the low number of exposures and absence of paradoxical eczema events attributed to these drugs.

<sup>b</sup> Model 3 included biologic class, smoking status and alcohol consumption status as covariates. Smoking status consisted of three categories, with never smokers as the reference group. Alcohol consumption was a binary variable indicating whether the participant was consuming alcohol at baseline or not.

**eTable 9. Number of exposures linked to eczema or dermatitis adverse events other than paradoxical eczema.**

| Adverse event phenotype                 | N   |
|-----------------------------------------|-----|
| Asteatotic eczema                       | 4   |
| Chronic actinic dermatitis              | 1   |
| Contact dermatitis                      | 46  |
| Discoid eczema                          | 3   |
| Hand or foot eczema (unspecified cause) | 11  |
| Photosensitive eczema                   | 1   |
| Pompholyx eczema                        | 16  |
| Seborrheic dermatitis                   | 38  |
| Stasis/venous eczema                    | 39  |
| <i>Total<sup>a</sup></i>                | 159 |

<sup>a</sup> Four adverse event descriptions were consistent with dual phenotypes: one with contact and seborrheic dermatitis, and three with pompholyx and paradoxical eczema. For the sensitivity analyses, any paradoxical eczema events which were included in the primary analysis were excluded.

**eTable 10. Propensity weight-adjusted Cox proportional hazards model for risk of other eczema phenotypes by biologic class, biologic drug or other covariates (sensitivity analysis).**

|                                                                       | Hazard ratio | 95% CI              | P-value |
|-----------------------------------------------------------------------|--------------|---------------------|---------|
| <i>Model 1 - biologic class (TNFi reference category)</i>             |              |                     |         |
| IL-17i                                                                | 1.14         | 0.72-1.81           | 0.57    |
| IL-12/23i                                                             | 1.07         | 0.74-1.56           | 0.77    |
| IL-23i                                                                | 1.25         | 0.65-2.44           | 0.50    |
| <i>Model 2 - individual biologics (adalimumab reference category)</i> |              |                     |         |
| Certolizumab pegol                                                    | 1.08         | 0.15-7.79           | 0.94    |
| Etanercept                                                            | 1.26         | 0.69-2.31           | 0.69    |
| Infliximab                                                            | 0.94         | 0.29-3.00           | 0.91    |
| Brodalumab                                                            | 0.75         | 0.10-5.42           | 0.77    |
| Ixekizumab                                                            | 0.64         | 0.19-2.12           | 0.47    |
| Secukinumab                                                           | 1.37         | 0.84-2.26           | 0.21    |
| Bimekizumab <sup>a</sup>                                              | NA           | NA                  | NA      |
| Ustekinumab                                                           | 1.12         | 0.75-1.66           | 0.58    |
| Guselkumab                                                            | 1.25         | 0.55-2.83           | 0.59    |
| Risankizumab                                                          | 1.82         | 0.64-5.19           | 0.26    |
| Tildrakizumab <sup>a</sup>                                            | NA           | NA                  | NA      |
| <i>Model 3 - other baseline clinical variables<sup>b</sup></i>        |              |                     |         |
| Age                                                                   | 1.02         | 1.01-1.04           | <0.001  |
| Male                                                                  | 0.78         | 0.56-1.09           | 0.14    |
| Ethnicity                                                             |              |                     |         |
| Black                                                                 | 1.29         | 0.17-9.69           | 0.80    |
| Chinese                                                               | 5.74e-17     | 3.89e-17 - 8.46e-17 | <0.001  |
| Other <sup>c</sup>                                                    | 0.61         | 0.15-2.51           | 0.50    |
| South Asian                                                           | 0.85         | 0.39-1.88           | 0.69    |
| Atopic dermatitis                                                     | 2.95         | 0.93-9.43           | 0.07    |
| Asthma                                                                | 1.38         | 0.87-2.19           | 0.17    |
| Hay fever                                                             | 4.10         | 1.54-10.90          | 0.005   |
| Psoriatic arthritis                                                   | 1.13         | 0.79-1.61           | 0.50    |
| Erythrodermic psoriasis                                               | 0.69         | 0.41-1.13           | 0.14    |
| Generalised pustular psoriasis                                        | 1.17         | 0.56-2.48           | 0.67    |
| Palmoplantar pustulosis                                               | 0.58         | 0.15-2.32           | 0.44    |

CI, confidence interval; IL, interleukin; IL-17i, IL-17 inhibitor; IL-12/23i, IL-12/23 inhibitor; IL-23i, IL-23 inhibitor; TNFi, tumour necrosis factor inhibitor.

<sup>a</sup>The data for bimekizumab and tildrakizumab are not shown due to unstable effect estimates, resulting from the low number of exposures and absence of eczema events attributed to these drugs.

<sup>b</sup>The Cox-proportional hazards model for model 3 included clinical covariates in addition to biologic class.

<sup>c</sup> "Other" ethnicities were either defined as other by the study participant, or were missing (n=20).

**eTable 11. Propensity weight-adjusted Cox proportional hazards model for risk of paradoxical eczema by biologic class or other covariates, adjusting time-varying use of non-biologic systemic therapies (sensitivity analysis).**

|                                             | <b>Hazard ratio</b> | <b>95% CI</b> | <b>P-value</b> |
|---------------------------------------------|---------------------|---------------|----------------|
| <b>Biologic class (TNFi reference)</b>      |                     |               |                |
| IL-17i                                      | 1.06                | 0.76-1.46     | 0.74           |
| IL-12/23i                                   | 0.87                | 0.65-1.16     | 0.33           |
| IL-23i                                      | 0.40                | 0.19-0.82     | 0.013          |
| <b>Concomitant non-biologic<sup>a</sup></b> |                     |               |                |
| Methotrexate                                | 0.62                | 0.37-1.04     | 0.07           |
| Ciclosporin                                 | 3.28                | 2.03-5.30     | <0.001         |
| Acitretin                                   | 0.36                | 0.05-2.61     | 0.31           |
| Apremilast                                  | 1.05                | 0.15-7.50     | 0.96           |
| Dimethyl fumarate                           | 2.47                | 0.69-8.79     | 0.16           |
| Age                                         | 1.02                | 1.01-1.03     | <0.001         |
| Male                                        | 0.62                | 0.47-0.82     | <0.001         |
| <b>Ethnicity</b>                            |                     |               |                |
| Black                                       | 1.36                | 0.32-5.76     | 0.67           |
| Chinese                                     | 2.69                | 0.98-7.41     | 0.0656         |
| Other <sup>b</sup>                          | 1.11                | 0.48-2.55     | 0.81           |
| South Asian                                 | 1.30                | 0.69-2.46     | 0.42           |
| Atopic dermatitis                           | 12.41               | 6.92-22.26    | <0.001         |
| Asthma                                      | 0.94                | 0.58-1.52     | 0.79           |
| Hay fever                                   | 3.53                | 1.37-9.09     | <0.001         |
| Psoriatic arthritis                         | 1.25                | 0.93-1.69     | 0.14           |
| Erythrodermic psoriasis                     | 1.11                | 0.77-1.60     | 0.58           |
| Generalised pustular psoriasis              | 0.84                | 0.44-1.60     | 0.59           |
| Palmoplantar pustulosis                     | 1.10                | 0.51-2.38     | 0.80           |

CI, confidence interval; IL, interleukin; IL-17i, IL-17 inhibitor; IL-12/23i, IL-12/23 inhibitor; IL-23i, IL-23 inhibitor; TNFi, tumour necrosis factor inhibitor.

<sup>a</sup>Concomitant non-biologic included as a categorical variable. Hydroxycarbamide and mycophenolate were excluded due to low sample numbers.

<sup>b</sup>“Other” ethnicities were either defined as other by the study participant, or were missing (n=20).

## References

1. Al-Janabi A, Foulkes AC, Mason K, Smith CH, Griffiths CEM, Warren RB. Phenotypic switch to eczema in patients receiving biologics for plaque psoriasis: a systematic review. *J Eur Acad Dermatol Venereol.* 2020;34(7):1440-8.
