# Supplementary material for: Risk of Paradoxical Eczema in Patients Receiving Biologics for Psoriasis
Source: PubMed Central journal article supplement (PMC10701661; doi:10.1001/jamadermatol.2023.4846), 2023-12-06
Supplement: jamadermatol-e234846-s002.pdf [file jamadermatol-e234846-s002.pdf]

\*First name, last name, and suffix (if applicable) are required and will appear in PubMed.

| <b>*Group Name(s): BADBIR Study Group</b> |                   |                              |                  |             |                                          |                                                         |                                                                                            |
|-------------------------------------------|-------------------|------------------------------|------------------|-------------|------------------------------------------|---------------------------------------------------------|--------------------------------------------------------------------------------------------|
| <b>*First Name and Middle Initial(s)</b>  | <b>*Last Name</b> | <b>*Suffix (eg, Jr, III)</b> | Academic Degrees | Institution | Location (city, state/province, country) | Role or Contribution, eg, chair, principal investigator | Group (if more than 1 Group listed in the byline) and/or Subgroup (eg, Steering Committee) |
| Philip                                    | Laws              |                              |                  |             |                                          |                                                         |                                                                                            |
| Shehnaz                                   | Ahmed             |                              |                  |             |                                          |                                                         |                                                                                            |
| Jonathan                                  | Barker            |                              |                  |             |                                          |                                                         |                                                                                            |
| Anthony                                   | Bewley            |                              |                  |             |                                          |                                                         |                                                                                            |
| Ian                                       | Evans             |                              |                  |             |                                          |                                                         |                                                                                            |
| Philip                                    | Hampton           |                              |                  |             |                                          |                                                         |                                                                                            |
| Olivia                                    | Hughes            |                              |                  |             |                                          |                                                         |                                                                                            |
| Brian                                     | Kirby             |                              |                  |             |                                          |                                                         |                                                                                            |
| Elise                                     | Kleyn             |                              |                  |             |                                          |                                                         |                                                                                            |
| Mark                                      | Lunt              |                              |                  |             |                                          |                                                         |                                                                                            |
| Teena                                     | Mackenzie         |                              |                  |             |                                          |                                                         |                                                                                            |
| Kathy                                     | McElhone          |                              |                  |             |                                          |                                                         |                                                                                            |
| Tess                                      | McPherson         |                              |                  |             |                                          |                                                         |                                                                                            |
| Simon                                     | Morrison          |                              |                  |             |                                          |                                                         |                                                                                            |
| Alexa                                     | Shipman           |                              |                  |             |                                          |                                                         |                                                                                            |
| Shernaz                                   | Walton            |                              |                  |             |                                          |                                                         |                                                                                            |
| Christina                                 | Ye                |                              |                  |             |                                          |                                                         |                                                                                            |
| Anja                                      | Strangfeld        |                              |                  |             |                                          |                                                         |                                                                                            |
| Girish                                    | Gupta             |                              |                  |             |                                          |                                                         |                                                                                            |
| Richard                                   | Weller            |                              |                  |             |                                          |                                                         |                                                                                            |
| Vera                                      | Zietemann         |                              |                  |             |                                          |                                                         |                                                                                            |
