# Supplementary material for: Risk of Paradoxical Eczema in Patients Receiving Biologics for Psoriasis
Source: PubMed Central journal article supplement (PMC10701661; doi:10.1001/jamadermatol.2023.4846), 2023-12-06
Supplement: jamadermatol-e234846-s003.pdf [file jamadermatol-e234846-s003.pdf]

## Data Sharing Statement

Al-Janabi. Risk of Paradoxical Eczema in Patients Receiving Biologics for Psoriasis. *JAMA Dermatol.* Published December 06, 2023. doi:10.1001/jamadermatol.2023.4846

### Data

**Data available:** No

### Additional Information

**Explanation for why data not available:** Restrictions apply to the availability of these data due to patient consent and licencing agreements; data were used under license for this study. The authors therefore cannot make these data publicly available. In order to access the data set, please see the process to apply: <http://www.badbir.org/Publications/DataAccess/>
